# Supplementary material for: High Energy Pulsed Laser Beam to Produce a Thin Layer of Crystalline Silver without Heating the Deposition Substrate and Its Catalytic Effects
Source: Preprints.org preprint supplement (doi:10.20944/preprints202403.1717.v1), 2024-03-28
Supplement: Supplementary file 2 [file supplementary]

Archive with 4 entries (4 files):
- Answer to Reviewer 1.pdf
- Answer to Reviewer 2.pdf
- Answer to Reviewer 3.pdf
- Dimitriu_for_QuBS_2024 - with evidenced changes.docx
