# Supplementary material for: High Energy Pulsed Laser Beam to Produce a Thin Layer of Crystalline Silver without Heating the Deposition Substrate and Its Catalytic Effects
Source: Preprints.org preprint supplement (doi:10.20944/preprints202403.1717.v1), 2024-03-28
Supplement: Supplementary file 3 [file supplementary]

# Answers to Reviewer 1

Dear Reviewer,

Thank you very much for your comments and suggestions. The manuscript was now improved, all the changes in the manuscript being made by using the *Track changes* function of MS Word. Please find below our point-to-point answers to your comments.

1. The article is devoted to the silver layer production by the high-energy pulsed laser deposition for catalytic application. Unfortunately, the article does not contain any novelty; the presented results are not original. Catalytic studies were carried out incorrectly.

The Introduction section was extended and the novelty content of this study was highlighted:

“The novelty of the study presented in this work consists in a complex analysis of the phenomena and physico-chemical processes that take place during the pulsed laser deposition of a thin layer of silver with impurities, as well as of those arising from the interaction of the thin layer with complex organic molecules in the sense of the catalytic effect. In the analysis of the ablation plasma plume, the novelty consists in obtaining information on the developed chemical species by using mass spectroscopy and the pulsed laser as source of ionization energy of the chemical species.”

The catalytic effect has been explained in the revised version of the manuscript.

2. English is very difficult to understand. There are a lot of grammatical errors, including inconsistent sentences, indirect word order in sentences, etc.

English in the article was revised by the help of a colleague from Faculty of Letters, English Department.

On behalf of all authors,

Prof. Dan-Gheorghe Dimitriu
